# Supplementary material
Source: publisher figshare collection journal article supplement (https://wiley.figshare.com/articles/dataset/_/3529079)
Supplement: Supplementary file 1 [file 1]

## METADATA

The variables in three different data sets (text in Courier New below) will be given a brief explanation (details regarding recording dates etc. are given in the main text):

- Improved\_(Exp. I).txt
- Reduced\_(Exp. II).txt
- LongTermFeeding.txt

## VARIABLES COMMON FOR THE THREE DATA SETS

### Predictor variables

- id: gives each female a unique identification number (factor variable).
- int\_bm: initial maternal body mass measured in kilograms (Kg; numerical variable).
- year: the experiments were replicated over two different years (factor variable with 2003 and 2004 as levels).
- season: responses to the experimental manipulation were recorded in three different seasons (factor variable with July, September and January as levels).

### Response variables

- maternal\_bm: female body mass measured in Kg (numerical).
- offspring\_bm: offspring body mass measured in Kg (numerical).
- offspring\_pres: female reproductive success (a binary variable where 0 = barren/calf not present and 1 = calf present).

## PREDICTOR VARIABLE NOT COMMON FOR THE THREE DATA SETS

### Reduced (Exp. I) and Improved (Exp. II) experiments

- manipulation (factor variable with two levels):
  - control (both experiments): control animals kept in the original herds.
  - improved (Exp. I): the group of animals moved from the herd utilizing natural pastures to the herd receiving supplementary winter feeding (short-term improved winter feeding conditions).
  - reduced (Exp. II): the group of animals moved from the herd receiving supplementary winter feeding to the herd utilizing natural pastures only (short-term reduced winter feeding conditions).

### Long-term feeding manipulation

- manipulation (factor variable with two levels):
  - control: the control group in Exp. I, i.e. animals utilizing natural pastures only.
  - improved: the control group in Exp. II, i.e. animals receiving supplementary winter feeding.

## GENERAL NOTES

- The data are stored as tab-delimited text files, and missing values are labelled NA.
- All three data sets can be simultaneously imported as separate objects into R ([www.r-project.org](http://www.r-project.org)) from the file `Data.RData`.
